# Supplementary material for: Prospective comparative study of the effects of lidocaine on urodynamic and sensory parameters in bladder pain syndrome
Source: Springer Nature journal article supplement (doi:10.1007/s00192-019-03892-2), 2019-03-14
Supplement: MOESM1 [file 16548660]

# THE KING'S HEALTH QUESTIONNAIRE

Your name:

Your Kaiser medical record number:

## 1. How would you describe your health at the present?

Please tick one answer

**Very good**

**Good**

**Fair**

**Poor**

**Very poor**

## 2. How much do you think your bladder problem affects your life?

Please tick one answer

**Not at all**

**A little**

**Moderately**

**A lot**

**Below are some daily activities that can be affected by bladder problems.  
How much does your bladder problem affect you?**

**We would like you to answer every question. Simply tick the box that applies to you**

| <b><u>3. ROLE LIMITATIONS</u></b>                                                                      | <b>1</b><br>Not at all | <b>2</b><br>Slightly  | <b>3</b><br>Moderately | <b>4</b><br>A lot     |
|--------------------------------------------------------------------------------------------------------|------------------------|-----------------------|------------------------|-----------------------|
| <b>A.</b> Does your bladder problem affect your household tasks?<br>(cleaning, shopping etc)           | <input type="radio"/>  | <input type="radio"/> | <input type="radio"/>  | <input type="radio"/> |
| <b>B.</b> Does your bladder problem affect your job, or your normal daily activities outside the home? | <input type="radio"/>  | <input type="radio"/> | <input type="radio"/>  | <input type="radio"/> |

| <b><u>4. PHYSICAL/SOCIAL LIMITATION</u></b>                                                                           | <b>1</b><br>Not at all | <b>2</b><br>Slightly  | <b>3</b><br>Moderately | <b>4</b><br>A lot     |
|-----------------------------------------------------------------------------------------------------------------------|------------------------|-----------------------|------------------------|-----------------------|
| <b>A.</b> Does your bladder problem affect your physical activities (e.g. going for a walk, running, sport, gym etc)? | <input type="radio"/>  | <input type="radio"/> | <input type="radio"/>  | <input type="radio"/> |
| <b>B.</b> Does your bladder problem affect your ability to travel?                                                    | <input type="radio"/>  | <input type="radio"/> | <input type="radio"/>  | <input type="radio"/> |
| <b>C.</b> Does your bladder problem limit your social life?                                                           | <input type="radio"/>  | <input type="radio"/> | <input type="radio"/>  | <input type="radio"/> |
| <b>D.</b> Does your bladder problem limit your ability to see and visit friends?                                      | <input type="radio"/>  | <input type="radio"/> | <input type="radio"/>  | <input type="radio"/> |

| <b><u>5. PERSONAL RELATIONSHIPS</u></b>                                         | <b>0</b><br>Not Applicable | <b>1</b><br>Not at all | <b>2</b><br>Slightly  | <b>3</b><br>Moderately | <b>4</b><br>A lot     |
|---------------------------------------------------------------------------------|----------------------------|------------------------|-----------------------|------------------------|-----------------------|
| <b>A.</b> Does your bladder problem affect your relationship with your partner? | <input type="radio"/>      | <input type="radio"/>  | <input type="radio"/> | <input type="radio"/>  | <input type="radio"/> |
| <b>B.</b> Does your bladder problem affect your sex life?                       | <input type="radio"/>      | <input type="radio"/>  | <input type="radio"/> | <input type="radio"/>  | <input type="radio"/> |
| <b>C.</b> Does your bladder problem affect your family life?                    | <input type="radio"/>      | <input type="radio"/>  | <input type="radio"/> | <input type="radio"/>  | <input type="radio"/> |

## **6. EMOTIONS**

|                                                                       | <b>1</b><br><b>Not at all</b> | <b>2</b><br><b>Slightly</b> | <b>3</b><br><b>Moderately</b> | <b>4</b><br><b>Very much</b> |
|-----------------------------------------------------------------------|-------------------------------|-----------------------------|-------------------------------|------------------------------|
| <b>A.</b> Does your bladder problem make you feel depressed?          | <input type="radio"/>         | <input type="radio"/>       | <input type="radio"/>         | <input type="radio"/>        |
| <b>B.</b> Does your bladder problem make you feel anxious or nervous? | <input type="radio"/>         | <input type="radio"/>       | <input type="radio"/>         | <input type="radio"/>        |
| <b>C.</b> Does your bladder problem make you feel bad about yourself? | <input type="radio"/>         | <input type="radio"/>       | <input type="radio"/>         | <input type="radio"/>        |

## **7.SLEEP/ENERGY**

|                                                                        | <b>1</b><br><b>Never</b> | <b>2</b><br><b>Sometimes</b> | <b>3</b><br><b>Often</b> | <b>4</b><br><b>All the time</b> |
|------------------------------------------------------------------------|--------------------------|------------------------------|--------------------------|---------------------------------|
| <b>A.</b> Does your bladder problem affect your sleep?                 | <input type="radio"/>    | <input type="radio"/>        | <input type="radio"/>    | <input type="radio"/>           |
| <b>B.</b> Does your bladder problem make you feel worn out and tired ? | <input type="radio"/>    | <input type="radio"/>        | <input type="radio"/>    | <input type="radio"/>           |

## **8.Do you do any of the following?**

|                                                          | <b>1</b><br><b>Never</b> | <b>2</b><br><b>Sometimes</b> | <b>3</b><br><b>Often</b> | <b>4</b><br><b>All the time</b> |
|----------------------------------------------------------|--------------------------|------------------------------|--------------------------|---------------------------------|
| <b>A.</b> Wear pads to keep dry?                         | <input type="radio"/>    | <input type="radio"/>        | <input type="radio"/>    | <input type="radio"/>           |
| <b>B.</b> Be careful how much fluid you drink ?          | <input type="radio"/>    | <input type="radio"/>        | <input type="radio"/>    | <input type="radio"/>           |
| <b>C.</b> Change your underclothes because they get wet? | <input type="radio"/>    | <input type="radio"/>        | <input type="radio"/>    | <input type="radio"/>           |
| <b>D.</b> Worry in case you smell?                       | <input type="radio"/>    | <input type="radio"/>        | <input type="radio"/>    | <input type="radio"/>           |

We would like to know what your bladder problems are and how much they affect you ? From the list below choose only those problems that you have at present. Leave out those that don't apply to you.

How much do they affect you?

**FREQUENCY:** going to the toilet very often

1. A little

2. Moderately

3. A lot

**NOCTURIA:** getting up at night to pass urine

1. A little

2. Moderately

3. A lot

**URGENCY:** a strong and difficult to control desire to pass urine

1. A little

2. Moderately

3. A lot

**URGE INCONTINENCE:** urinary leakage associated with a strong desire to pass urine

1. A little

2. Moderately

3. A lot

**STRESS INCONTINENCE:** urinary leakage with physical activity eg. coughing, running

1. A little

2. Moderately

3. A lot

**NOCTURNAL ENURESIS:** wetting the bed at night

1. A little

2. Moderately

3. A lot

**INTERCOURSE INCONTINENCE:** urinary leakage with sexual intercourse

1. A little

2. Moderately

3. A lot

**WATERWORKS INFECTIONS**

1. A little

2. Moderately

3. A lot

**BLADDER PAIN**

1. A little

2. Moderately

3. A lot

*Thank You For Your Time*
