# Supplementary material for: Prospective comparative study of the effects of lidocaine on urodynamic and sensory parameters in bladder pain syndrome
Source: Springer Nature journal article supplement (doi:10.1007/s00192-019-03892-2), 2019-03-14
Supplement: MOESM2 [file 16548660]

Appendix 2: Adapted from Mayer et al, 2012. The Central Sensitization Inventory: Part B.

| Have you been diagnosed by a doctor with any of the following disorders?<br>Please check the box to the right for each diagnosis and write the year of the diagnosis |                                        |    |     |                |
|----------------------------------------------------------------------------------------------------------------------------------------------------------------------|----------------------------------------|----|-----|----------------|
|                                                                                                                                                                      |                                        | NO | YES | Year Diagnosed |
| 1                                                                                                                                                                    | Restless Leg Syndrome                  |    |     |                |
| 2                                                                                                                                                                    | Chronic Fatigue Syndrome               |    |     |                |
| 3                                                                                                                                                                    | Fibromyalgia                           |    |     |                |
| 4                                                                                                                                                                    | Temporomandibular Joint Disorder (TMJ) |    |     |                |
| 5                                                                                                                                                                    | Tension Headaches / Migraines          |    |     |                |
| 6                                                                                                                                                                    | Irritable Bowel Syndrome               |    |     |                |
| 7                                                                                                                                                                    | Multiple Chemical Sensitivities        |    |     |                |
| 8                                                                                                                                                                    | Neck Injury (including whiplash)       |    |     |                |
| 9                                                                                                                                                                    | Anxiety or Panic attacks               |    |     |                |
| 10                                                                                                                                                                   | Depression                             |    |     |                |
