# Supplementary material for: Prospective comparative study of the effects of lidocaine on urodynamic and sensory parameters in bladder pain syndrome
Source: Springer Nature journal article supplement (doi:10.1007/s00192-019-03892-2), 2019-03-14

Appendix 3: Numeric pain rating scale

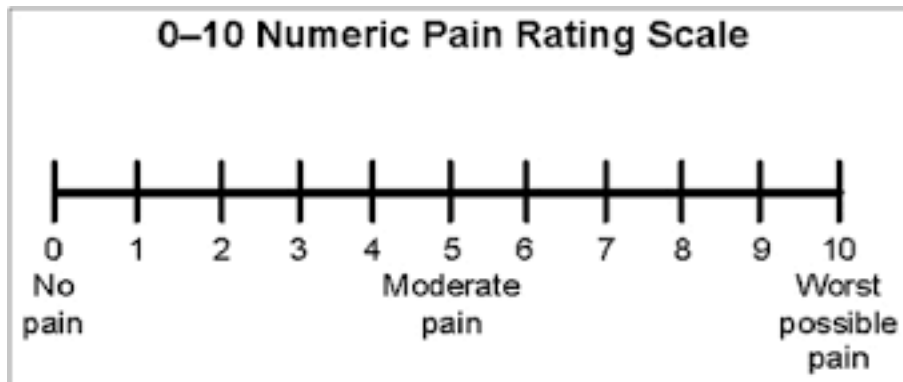

Supplement: MOESM3 [file 16548660]
